# Supplementary material for: Cytotoxic and inflammatory potential of size-fractionated particulate matter collected repeatedly within a small urban area
Source: PubMed Central journal article supplement (PMC4502610; doi:10.1186/s12989-015-0099-z), 2015-07-16
Supplement: 12989_2015_99_MOESM2_ESM.pdf [file 12989_2015_99_MOESM2_ESM.pdf]

J774

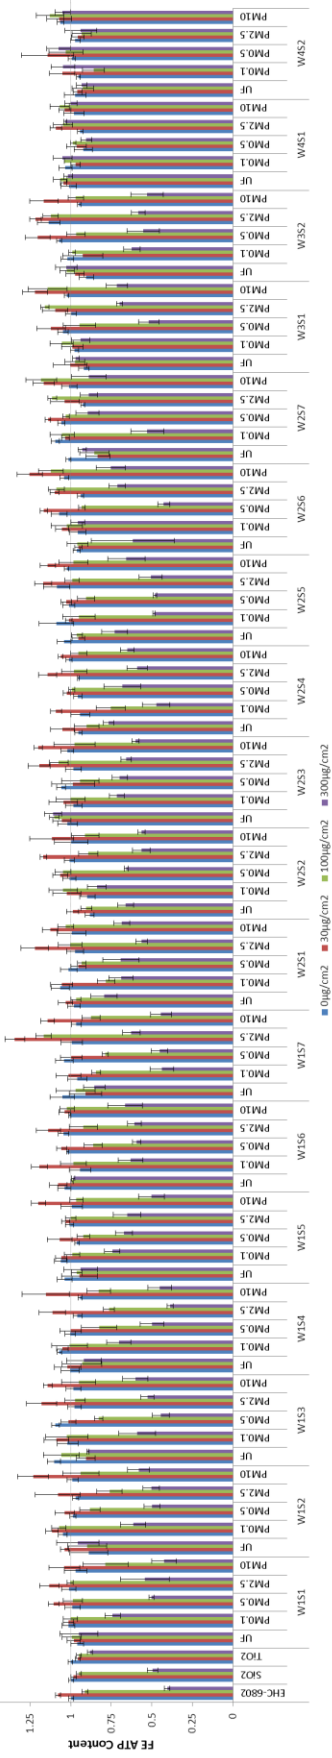

A

J774

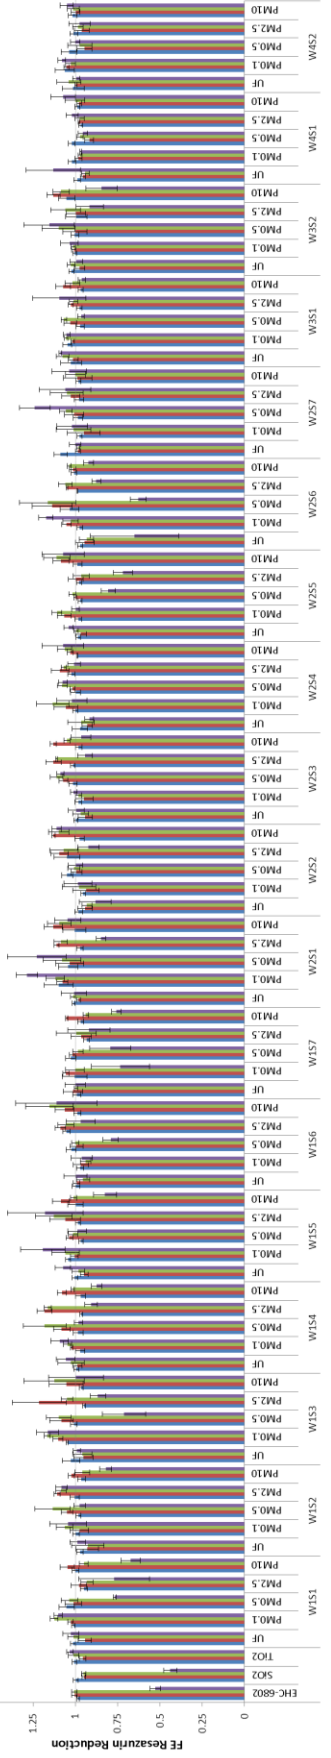

B

J774

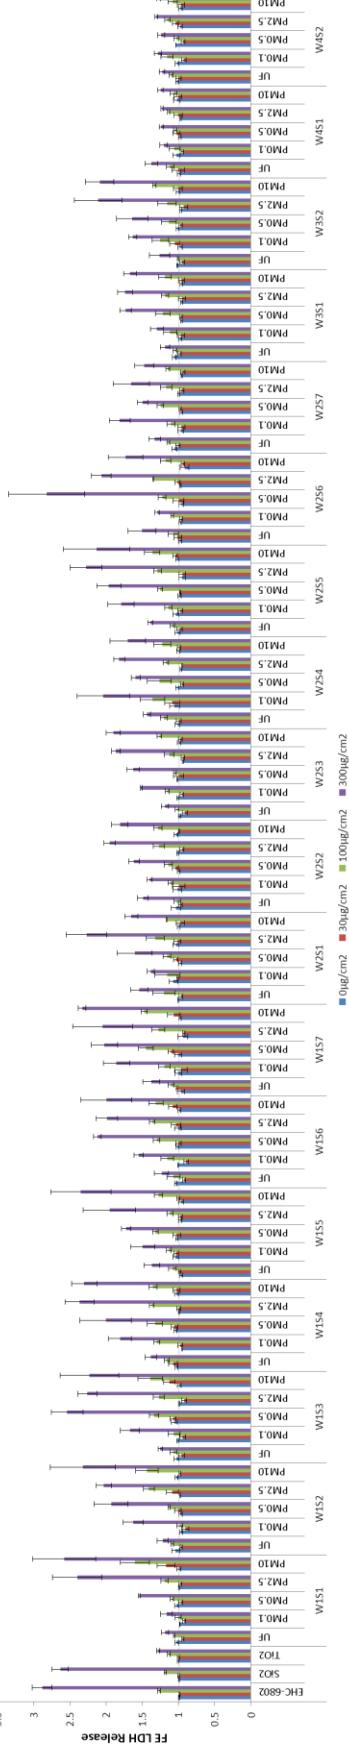

C
