# Supplementary material for: Cytotoxic and inflammatory potential of size-fractionated particulate matter collected repeatedly within a small urban area
Source: PubMed Central journal article supplement (PMC4502610; doi:10.1186/s12989-015-0099-z), 2015-07-16

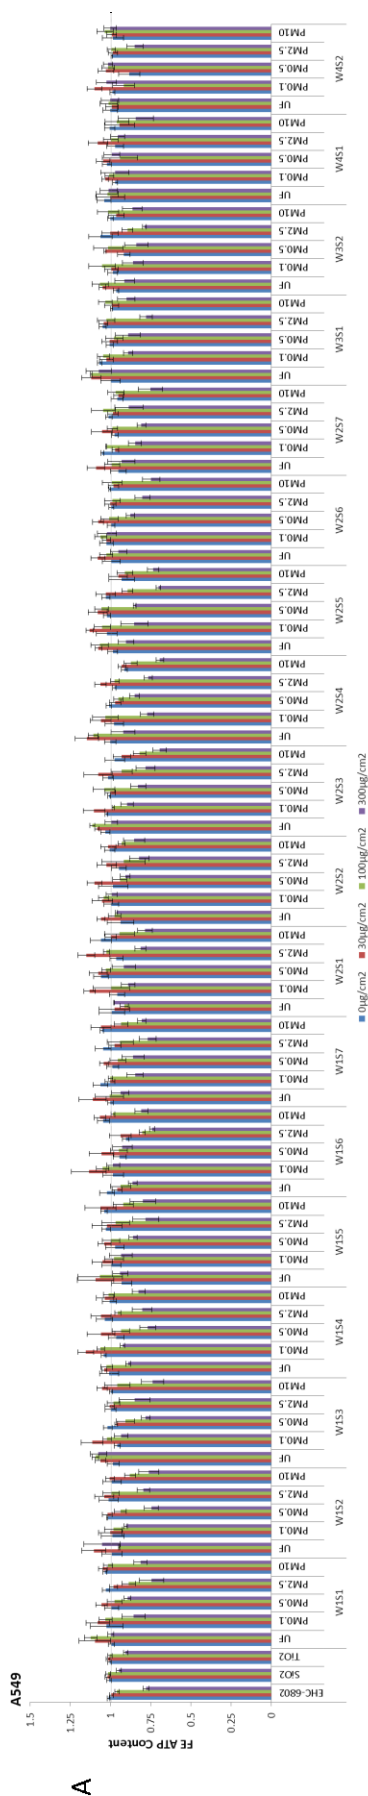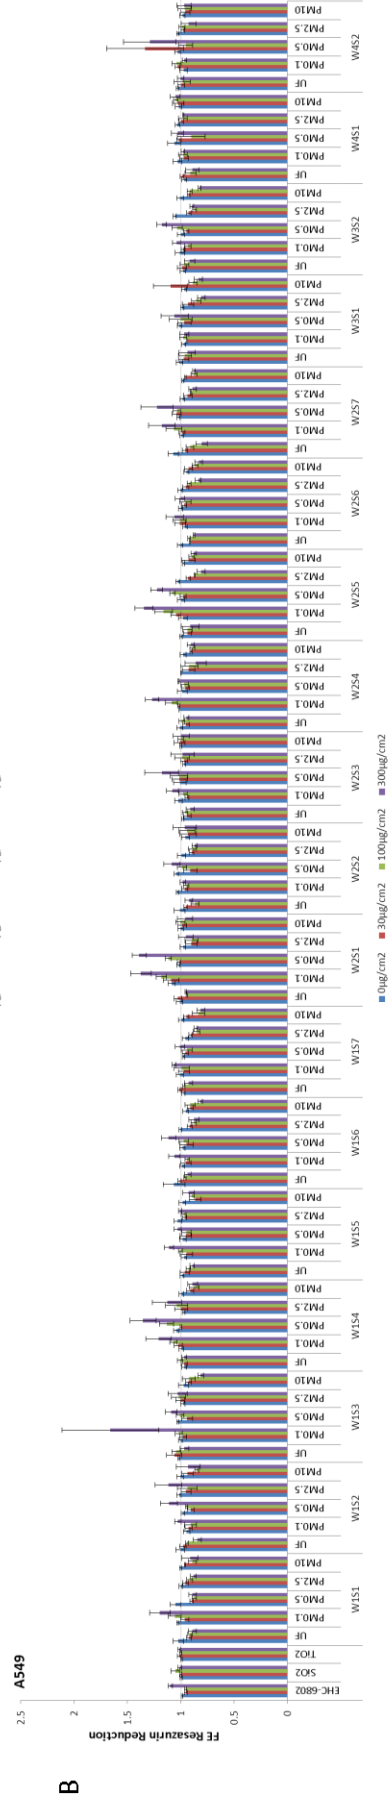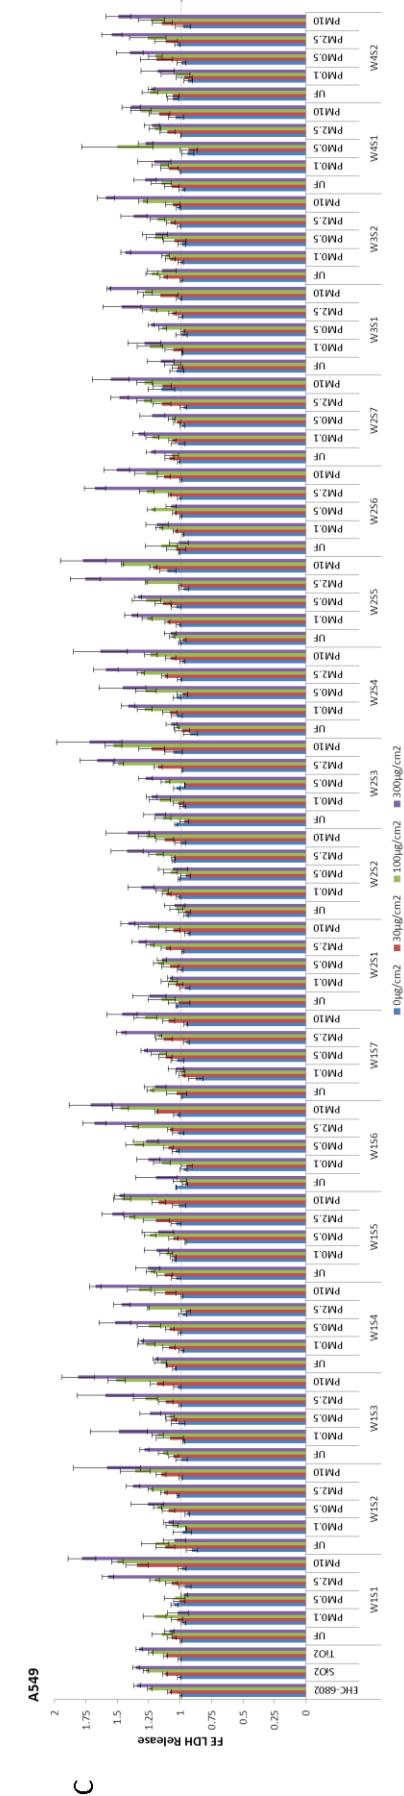

Supplement: 12989_2015_99_MOESM3_ESM.pdf [file 12989_2015_99_MOESM3_ESM.pdf]
